# Supplementary material for: Humoral and Cellular Immune Response in Asymptomatic Dogs with Visceral Leishmaniasis: A Review
Source: MDPI journal article supplement (doi:10.3390/vaccines10060947), 2022-06-14
Supplement: s1 [file s1]

**Table S1.** Keywords used for systematic searches in the Medline database (PubMed).

| General Search Terms *                                                                                               | Search Terms Referring to the Clinical Status of Dogs                           | Search Terms Referring to a Parasite-Specific Immune Response                                                                            |
|----------------------------------------------------------------------------------------------------------------------|---------------------------------------------------------------------------------|------------------------------------------------------------------------------------------------------------------------------------------|
| Visceral leishmaniasis;<br><i>Leishmania donovani</i> ;<br><i>Leishmania chagasi</i> ;<br><i>Leishmania infantum</i> | AND asymptomatic dog<br>AND susceptible dog<br>AND subclinical disease AND dogs | AND Immune response<br>AND Immune system<br>AND humoral<br>AND cellular response<br>AND Th1 response<br>AND Th2 response<br>AND cytokine |

\* Each one of these keywords was searched along with each cluster of terms in the following columns.

**Table S2.** Keywords used in the secondary literature review in the Medline database (PubMed).

| General Search Terms                                                                                                 | Search Terms Referring to the Clinical Status of Dogs                             | Search Terms Added in the Secondary Review Referring to: |                              |                             |                         |                        |             |
|----------------------------------------------------------------------------------------------------------------------|-----------------------------------------------------------------------------------|----------------------------------------------------------|------------------------------|-----------------------------|-------------------------|------------------------|-------------|
|                                                                                                                      |                                                                                   | Phenotypic Characterization                              |                              | Functional Characterization |                         | Humoral Response       |             |
|                                                                                                                      |                                                                                   | T- and B-Cell Markers                                    | Activation Status of T Cells | Cytokine Profile            | NO and ROS Production   | Proliferative Capacity | IgG Subtype |
| Visceral leishmaniasis;<br><i>Leishmania donovani</i> ;<br><i>Leishmania chagasi</i> ;<br><i>Leishmania infantum</i> | AND asymptomatic dog;<br>AND susceptible dog;<br>AND subclinical disease AND dogs | CD5                                                      |                              | IL-4                        |                         |                        |             |
|                                                                                                                      |                                                                                   | CD3                                                      |                              | IL-12                       |                         |                        |             |
|                                                                                                                      |                                                                                   | CD4                                                      | CD45RB                       | IL-2                        |                         |                        |             |
|                                                                                                                      |                                                                                   | CD8                                                      | CD45RA                       | IL-6                        | Nitric oxide;           |                        |             |
|                                                                                                                      |                                                                                   | Foxp3                                                    | MHC-II                       | IFN- $\gamma$               | Oxidative stress;       | Lymphopro-             | IgG1        |
|                                                                                                                      |                                                                                   | T regulatory cell;                                       | Activated T cells            | TNF- $\alpha$               | Reactive oxygen species | liferative             | IgG2        |
|                                                                                                                      |                                                                                   | Treg                                                     | Activation of T cells        | IL-10                       |                         |                        |             |
|                                                                                                                      |                                                                                   | CD21                                                     |                              | IL-18                       |                         |                        |             |
|                                                                                                                      |                                                                                   |                                                          |                              | TGF- $\beta$                |                         |                        |             |
|                                                                                                                      |                                                                                   |                                                          |                              | IL-17                       |                         |                        |             |

NO: Nitric oxide; ROS: Reactive oxygen species; Treg: regulatory T cells.

**Table S3.** Studies that analyze the lymphoproliferative response of PBMC upon *Leishmania* antigens from infected and control dogs.

| Antigens Used        |                          | Clinical Classification (Number of Dogs) | Geographical Location                                                                 | Type of Infection                     | Lymphoproliferative Response (PR) | Reference                                                                                  |     |
|----------------------|--------------------------|------------------------------------------|---------------------------------------------------------------------------------------|---------------------------------------|-----------------------------------|--------------------------------------------------------------------------------------------|-----|
| Common Antigens Used | Additional Antigens Used |                                          |                                                                                       |                                       |                                   |                                                                                            |     |
| SLA                  | 10 µg/mL                 | -                                        | AD ( <i>n</i> = 6)<br>SD ( <i>n</i> = 7)<br>CD                                        | Barajas (Spain)                       | Experimental                      | PR upon SLA in PBMC from AD, but not in SD.                                                | [1] |
|                      |                          | -                                        | AD ( <i>n</i> = 7)<br>SD ( <i>n</i> = 3)<br>CD                                        | Portugal                              | Natural & Experimental            | PR upon SLA in PBMC from both SD and AD.                                                   | [2] |
|                      |                          | -                                        | AD ( <i>n</i> = 78)<br>OD ( <i>n</i> = 2)<br>PD ( <i>n</i> = 7)                       | Madrid (Spain)                        | Natural                           | PR upon SLA in 27% of AD dogs, but in none of SD dogs.                                     | [3] |
|                      | P-8                      | -                                        | AD ( <i>n</i> = 8)<br>OD ( <i>n</i> = 12)<br>PD ( <i>n</i> = 1)<br>CD ( <i>n</i> = 9) | Cali (Colombia) and Madrid (Spain)    | Experimental                      | PR upon SLA and P-8 in PBMC from AD and OD, but not in SD.                                 | [4] |
|                      |                          | HSP-70, PFR-2, KMP-11                    | AD ( <i>n</i> = 4)<br>OD ( <i>n</i> = 5)<br>PD ( <i>n</i> = 4)<br>CD ( <i>n</i> = 2)  | Spain                                 | Experimental                      | PR upon SLA in PBMC from AD, but not in SD. PR upon HSP-70 and PFR-2 in PBMC was moderate. | [5] |
|                      |                          | rLeIF, rLdp23                            | AD ( <i>n</i> = 7)<br>SD ( <i>n</i> = 10)<br>CD ( <i>n</i> = 10)                      | Naples area and Reggio Emilia (Italy) | Natural                           | PR upon rLeIF and rLdp23, but not SLA, only in PBMC from AD dogs.                          | [6] |
|                      | 20 µg/mL                 | -                                        | AD ( <i>n</i> = 2)<br>SD ( <i>n</i> = 4)<br>CD ( <i>n</i> = 20)                       | St Feliu de Codines (Spain)           | Experimental                      | PR upon SLA in PBMC from both AD and SD.                                                   | [7] |
|                      |                          | -                                        | AD ( <i>n</i> = 132)<br>SD ( <i>n</i> = 106)<br>CD ( <i>n</i> = 20)                   | Barcelona and Mallorca (Spain)        | Natural                           | PR upon SLA in PBMC from some AD dogs.                                                     | [8] |
|                      | 25 µg/mL                 | f/t <i>L.c.</i> antigen                  | AD                                                                                    | Cali (Colombia)                       | Experimental                      | PR upon f/t <i>L.c.</i> antigen was                                                        | [9] |

|                         |                                  |                    |                                                                                                      |                                 |                             |                                                                                                                                                        |      |
|-------------------------|----------------------------------|--------------------|------------------------------------------------------------------------------------------------------|---------------------------------|-----------------------------|--------------------------------------------------------------------------------------------------------------------------------------------------------|------|
|                         |                                  |                    | OD<br>PD<br>CD                                                                                       |                                 |                             | similar and low in PBMC<br>from all groups.                                                                                                            |      |
| AM                      | 1x10 <sup>7</sup><br>amastigotes | rLdcccys1          | AD (n = 18)<br>OD (n = 14)<br>SD (n = 17)<br>CD (n = 6)                                              | Teresina (Brazil)               | Natural                     | PR upon AM and rLdcccys1<br>in PBMC from AD, but low<br>or negative in OD and SD.                                                                      | [10] |
|                         | 1 µg/mL                          | gp63               | AD (n = 5)<br>SD (n = 11)<br>CD (n = 3)                                                              | Kemisset and<br>Rabat (Morocco) | Natural & Exper-<br>imental | PR upon f/t <i>L.i.</i> antigen and<br>gp63 in PBMC from AD,<br>but not in SD.                                                                         | [11] |
|                         | 5 µg/mL                          | rCPA, rCPB         | AD (n = 7)<br>SD (n = 4)<br>CD (n = 3)                                                               | Meshkinshahr<br>(Iran)          | Natural                     | PR upon all antigens in<br>PBMC from AD, but low or<br>negative in SD.                                                                                 | [12] |
|                         |                                  | rCPA, rCPB,<br>CTE | AD (n = 7)<br>SD (n = 6)<br>CD (n = 3)                                                               | Meshkinshahr<br>(Iran)          | Natural                     | PR upon all antigens in<br>PBMC from AD, but not in<br>SD.                                                                                             | [13] |
| f/t <i>L.i.</i> antigen | 10 µg/mL                         | -                  | Infected resistant<br>(n = 4)<br>Infected suscepti-<br>ble (n = 3)<br>Clinical (n = 4)<br>CD (n = 2) | Iowa (USA)                      | Natural                     | PR upon f/t <i>L.i.</i> antigen in<br>PBMC CD4 <sup>+</sup> T cells from<br>infected resistant and sus-<br>ceptible dogs, but low in<br>clinical dogs. | [14] |
|                         |                                  | -                  | AD<br>SD<br>(n > 18)                                                                                 | Iowa (USA)                      | Natural                     | PR upon f/t <i>L.i.</i> antigen in<br>CD4 <sup>+</sup> and CD8 <sup>+</sup> T cells from<br>AD, but not in SD.                                         | [15] |
|                         | 50 µg/mL                         | -                  | AD (n = 37)<br>CD (n = 34)                                                                           | Oporto (Portugal)               | Natural                     | PR upon f/t <i>L.i.</i> antigen in<br>5% of AD dogs, but none in<br>CD dogs.                                                                           | [16] |
|                         |                                  | -                  | AD (n = 49)<br>CD (n = 25)                                                                           | South of<br>Alijo (Portugal)    | Natural                     | PR upon f/t <i>L.i.</i> antigen in<br>41% of AD dogs, but none<br>in CD dogs.                                                                          | [17] |

PR: proliferative response; PBMC: peripheral blood mononuclear cells; f/t antigen: freezed/thawed antigen; AM: amastigote extracts; SLA: soluble *Leishmania* antigen; AD: asymptomatic dogs; OD: oligosymptomatic dogs; SD: symptomatic dogs; PD: polysymptomatic; CD: control healthy dogs; *L.i.*: *Leishmania infantum*; *L.c.*: *Leishmania chagasi*.

**Table S4.** Studies that analyze the cytokine production profile of infected and control dogs.

| Cytokine Profile      | Cytokines Evaluated   | Detection Technique | Clinical Classification (Number of Dogs)                                    | Geographical Location        | Type of Infection | Antigen Stimulation (PBMC/ PB /Serum) | Main Findings †                                                                                                                                                                                                                                                | Reference |
|-----------------------|-----------------------|---------------------|-----------------------------------------------------------------------------|------------------------------|-------------------|---------------------------------------|----------------------------------------------------------------------------------------------------------------------------------------------------------------------------------------------------------------------------------------------------------------|-----------|
| Th1                   | IFN- $\gamma$         | CPE assay           | AD (n = 6)<br>SD (n = 7)<br>CD (-)                                          | Barajas (Spain)              | Experimental      | SLA (PBMC)                            | IFN- $\gamma$ activity only in AD.                                                                                                                                                                                                                             | [18]      |
| Th2                   | IL-4, IL-10           | FC                  | AD (n = 7)<br>SD (n = 7)<br>CD (n = 7)                                      | USA and Natal (Brazil)       | Natural           | Unstimulated (PBMC)                   | ↑ % IL10 <sup>+</sup> B cells in SD (***) and AD (*) <i>versus</i> CD.<br>↑ % IL-4 <sup>+</sup> IgD <sup>hi</sup> B cells in SD <i>versus</i> CD (*).                                                                                                          | [19]      |
|                       |                       |                     | AD (n = 23)<br>SD (n = 22)<br>CD (n = 30)                                   | Campania re-<br>gion (Italy) | Natural           | Unstimulated (PBMC)                   | ↑ % IFN- $\gamma$ + IL-4 <sup>+</sup> T cells in infected dogs <i>versus</i> CD (*).                                                                                                                                                                           | [20]      |
| Mixed Th1/Th2 profile | IFN- $\gamma$ , IL-4  | FC                  | AD-I (n = 34)<br>AD-II (n = 20)<br>OD (n = 8)<br>SD (n = 42)<br>CD (n = 28) | Belo Horizonte (Brazil)      | Natural           | SLA (PB)                              | ↑ % IFN- $\gamma$ <sup>+</sup> CD4 <sup>+</sup> , IFN- $\gamma$ <sup>+</sup> , and IL-4 <sup>+</sup> CD8 <sup>+</sup> T cells in AD-II and SD <i>versus</i> AD-I and CD (****).<br>↑ % IL-4 <sup>+</sup> CD4 <sup>+</sup> T cells in SD <i>versus</i> CD (**). | [21]      |
|                       |                       |                     | AD (n = 20)<br>SD (n = 20)<br>CD (n = 20)                                   | Atenas (Greece)              | Natural           | SLA (PB)                              | ↑ % IFN- $\gamma$ <sup>+</sup> and IL-4 <sup>+</sup> CD4 <sup>+</sup> and CD8 <sup>+</sup> T cells in SD <i>versus</i> AD and CD.                                                                                                                              | [22]      |
|                       | IFN- $\gamma$ , IL-10 | ELISA               | Infected re-<br>sistant (n = 4)<br>Infected suscep-                         | Iowa (USA)                   | Natural           | f/t <i>L.i.</i> antigen (PBMC)        | ↑ IFN- $\gamma$ in subclinical and resistant dogs <i>versus</i> clinical dogs and                                                                                                                                                                              | [14]      |

|                                                                    |                                   |                                                                                                                                               |                                          |                             |                                             |                                                                                                                                                                                         |      |
|--------------------------------------------------------------------|-----------------------------------|-----------------------------------------------------------------------------------------------------------------------------------------------|------------------------------------------|-----------------------------|---------------------------------------------|-----------------------------------------------------------------------------------------------------------------------------------------------------------------------------------------|------|
|                                                                    |                                   | tible ( <i>n</i> = 3)<br>Clinical ( <i>n</i> = 4)<br>CD ( <i>n</i> = 2)                                                                       |                                          |                             |                                             | CD (*).<br>↑ IL-10 with disease<br>progression (*).                                                                                                                                     |      |
|                                                                    | FC and<br>ELISA                   | AD<br>SD<br>( <i>n</i> > 18)                                                                                                                  | Iowa (USA)                               | Natural                     | f/t <i>L.i.</i> antigen<br>(PBMC)           | ↑ IL-10 + CD4 <sup>+</sup> T cells in<br>SD <i>versus</i> AD (**).<br>↓ IFN-γ + CD4 <sup>+</sup> (*) and<br>CD8 <sup>+</sup> (ns) T cells in SD<br><i>versus</i> AD.                    | [15] |
|                                                                    | ELISA                             | State I ( <i>n</i> = 10)<br>State IIa ( <i>n</i> = 27)<br>State lib ( <i>n</i> = 9)<br>State III ( <i>n</i> = 10)<br>State IV ( <i>n</i> = 4) | Catalunya and<br>Balears (Spain)         | Natural                     | SLA (PB)                                    | ↑ IFN-γ in stage I and<br>IIa dogs <i>versus</i> stage lib,<br>III, and IV (*).<br>Similar levels of IL-10<br>between groups.                                                           | [23] |
| IFN-γ, IL-4,<br>IL-10                                              | ELISA                             | AD ( <i>n</i> = 18)<br>OD ( <i>n</i> = 14)<br>SD ( <i>n</i> = 17)<br>CD ( <i>n</i> = 6)                                                       | Teresina (Brazil)                        | Natural                     | rLdcys (PBMC)                               | ↑ IFN-γ in AD and OD.<br>↑ IL-4 only in SD.<br>↑ IL-10 in SD and OD.                                                                                                                    | [10] |
|                                                                    | ELISA and<br>RT-qPCR              | AD<br>OD<br>PD<br>CD                                                                                                                          | Cali (Colombia)                          | Experimental                | SLA (PBMC)                                  | ↑ IFN-γ in PD <i>versus</i> AD<br>and OD (*).<br>Similar levels of IL-10<br>between groups.                                                                                             | [9]  |
| IFN-γ, TNF-α,<br>IL-4, IL-10                                       | RT-qPCR                           | AD ( <i>n</i> = 13)<br>SD ( <i>n</i> = 9)                                                                                                     | Apulian region<br>(Italy)                | Natural                     | SLA (PBMC)                                  | ↑ IFN-γ, TNF-α, IL-4,<br>and IL-10 in SD <i>versus</i><br>AD (*).                                                                                                                       | [24] |
| IFN-γ, TNF-α,<br>IL-4, IL-10, IL-<br>18                            | RT-qPCR                           | AD ( <i>n</i> = 8)<br>OD ( <i>n</i> = 12)<br>PD ( <i>n</i> = 1)<br>CD ( <i>n</i> = 9)                                                         | Cali (Colombia)<br>and Madrid<br>(Spain) | Experimental                | SLA and P-8<br>(PBMC)                       | ↑ IFN-γ and TNF-α in<br>AD <i>versus</i> PD.<br>Similar levels of IL-4<br>between groups.<br>↓ IL-10 in AD and OD.<br>↑ IL-18 in PD.                                                    | [5]  |
|                                                                    |                                   | AD ( <i>n</i> = 4)<br>OD ( <i>n</i> = 5)<br>PD ( <i>n</i> = 4)<br>CD ( <i>n</i> = 2)                                                          | Spain                                    | Experimental                | SLA, HSP-70,<br>PFR-2 and KMP-<br>11 (PBMC) | ↑ IFN-γ and TNF-α in<br>AD <i>versus</i> SD.<br>Similar levels of IL-4<br>between groups.                                                                                               | [5]  |
| IFN-γ, TNF-α,<br>IL-4, IL-10, IL-<br>18, IL-2, IL-6                | Semiquanti-<br>tative RT-<br>PCR  | AD ( <i>n</i> = 7)<br>CD ( <i>n</i> = 5)                                                                                                      | Unknown                                  | Experimental                | SLA (PBMC)                                  | ↑ IFN-γ (*), IL-4 (*), IL-<br>10 (ns), and IL-2 (ns) in<br>AD <i>versus</i> CD.                                                                                                         | [25] |
| IFN-γ, TNF-α,<br>IL-10, IL-18,<br>IL-2, IL-6, IL-7,<br>IL-8, IL-15 | ELISA and<br>Milliplex<br>Map Kit | AD ( <i>n</i> = 22)<br>Stage I ( <i>n</i> = 21)<br>Stage III ( <i>n</i> = 15)                                                                 | Camaçari (Bra-<br>zil)                   | Natural                     | Unstimulated<br>(serum)                     | ↑ IL-10 in dogs with<br>stage I and II (ns).<br>↑ IL-18 and IL-6 in AD<br>(ns).                                                                                                         | [26] |
|                                                                    | Luminex<br>assay                  | AD ( <i>n</i> = 20)<br>CD ( <i>n</i> = 8)                                                                                                     | NE areas of<br>Brazil                    | Natural & Ex-<br>perimental | Unstimulated<br>(serum)                     | ↑ IFN-γ, IL-10, IL-18,<br>and IL-6 in AD <i>versus</i><br>CD (**).<br>↓ TNF-α, IL-2, and IL-8<br>in AD <i>versus</i> CD (**).<br>Similar levels of IL-7<br>and IL-15 between<br>groups. | [27] |
| IFN-γ, IL-4,<br>IL-2, IL-12                                        | RT-qPCR                           | AD ( <i>n</i> = 13)<br>SD ( <i>n</i> = 29)<br>CD ( <i>n</i> = 11)<br>TD ( <i>n</i> = 11)                                                      | E areas from<br>Portugal and<br>Brazil   | Natural                     | Unstimulated<br>(PB)                        | ↑ IFN-γ, IL-4, IL-2, and<br>IL-12 in SD <i>versus</i> CD<br>(*).<br>↑ IL-4 in AD <i>versus</i> CD<br>(*).                                                                               | [28] |
| IFN-γ, IL-4,<br>IL-10, IL-18,<br>IL-2, IL-12, IL-<br>18            | RT-qPCR                           | AD ( <i>n</i> = 20)<br>ADD ( <i>n</i> = 20)<br>SD ( <i>n</i> = 20)<br>CD ( <i>n</i> = 20)                                                     | Campania (Ita-<br>lia)                   | Natural                     | Unstimulated<br>(PB)                        | ↑ IFN-γ, IL-4, IL-10, IL-<br>18, and IL-2 in AD.<br>↑ IL-18 in ADD and,<br>later in the infection, ↑<br>all cytokines analyzed.<br>↑ Th1 and Th2 cytokines<br>in SD.                    | [29] |

CPE: cytopathic effect inhibition assay; FC: flow cytometry; RT-qPCR: quantitative reverse transcription polymerase chain reaction; PBMC: peripheral blood mononuclear cells; PB: peripheral blood; f/t antigen: freezed/thawed antigen; SLA: soluble *leishmania* antigen; AD: asymptomatic dogs; AD-I: asymptomatic dogs with negative serology; AD-II: asymptomatic dogs with positive serology; ADD: asymptomatic dogs who progressed overt the disease; OD: oligosymptomatic dogs; SD: symptomatic dogs; PD: polysymptomatic dogs; CD: control healthy dogs; TD: treated infected dogs; E: endemic areas; NE: non-endemic areas; *L.i.*: *Leishmania infantum*; *L.c.*: *Leishmania*

*chagasi*. † These results refer to cytokine production after stimulation with *Leishmania* antigens, in those articles where PBMC/peripheral blood stimulation is carried out.  $p < 0.05$  (\*),  $p < 0.01$  (\*\*),  $p < 0.001$  (\*\*\*),  $p < 0.0001$  (\*\*\*\*), and not significant (ns).

**Table S5.** Studies that analyze the humoral response in infected and control dogs.

| Isotype Analyzed | Subclass Analyzed | Detection Technique | Antigen (Type of Antibody)                                | Clinical Classification (Number of Dogs)                                    | Geographical Location              | Type of Infection      | Main Findings                                                 | Reference |
|------------------|-------------------|---------------------|-----------------------------------------------------------|-----------------------------------------------------------------------------|------------------------------------|------------------------|---------------------------------------------------------------|-----------|
| IgG              | IgG1, IgG2        | ELISA               | <i>L.i.</i> antigens (polyclonal)                         | AD ( $n = 6$ )<br>TSD ( $n = 8$ )<br>CD ( $n = 22$ )                        | France                             | Natural                | IgG2 associated with AD.                                      | [30]      |
|                  |                   |                     | <i>L.i.</i> antigens (polyclonal)                         | AD ( $n = 1$ )<br>OD ( $n = 1$ )<br>SD ( $n = 2$ )<br>CD ( $n = 1$ )        | Caceres (Spain)                    | Experimental           | IgG1 associated with SD.                                      | [31]      |
|                  |                   |                     | <i>L.i.</i> sonicated promastigotes (polyclonal)          | AD ( $n = 11$ )<br>SD ( $n = 139$ )<br>TSD ( $n = 25$ )<br>TD ( $n = 6$ )   | Priorat and Barcelona (Spain)      | Natural & Experimental | IgG1 associated with SD.                                      | [32]      |
|                  |                   |                     | SLA (polyclonal)                                          | AD ( $n = 7$ )<br>SD ( $n = 3$ )<br>CD                                      | Portugal                           | Natural & Experimental | Similar IgG1 levels among groups.<br>IgG2 associated with SD. | [2]       |
|                  |                   |                     | SLA (polyclonal)                                          | AD<br>SD<br>CD                                                              | Alto Douro region (Portugal)       | Natural                | IgG2 associated with SD.                                      | [33]      |
|                  |                   |                     | f/t <i>L.i.</i> antigen, rCPA, rCPB, and CTE (polyclonal) | AD ( $n = 7$ )<br>SD ( $n = 6$ )<br>CD ( $n = 3$ )                          | Meshkinshahr (Iran)                | Natural                | IgG2 associated with AD.                                      | [13]      |
|                  |                   |                     | f/t <i>L.i.</i> antigen (polyclonal)                      | AD ( $n = 13$ )<br>SD ( $n = 42$ )<br>CDE ( $n = 21$ )<br>CDNE ( $n = 18$ ) | E and NE areas from Brazil         | Natural                | IgG2 associated with SD.                                      | [34]      |
|                  |                   |                     | Protein A (polyclonal)                                    | AD ( $n = 29$ )<br>SD ( $n = 23$ )<br>CDE ( $n = 3$ )<br>CDNE ( $n = 19$ )  | Spain and France                   | Natural                | IgG1 associated with SD.<br>↑ IgG2 in AD and SD.              | [35]      |
|                  |                   |                     | SLA (polyclonal)                                          | AD ( $n = 12$ )<br>OD ( $n = 12$ )<br>SD ( $n = 16$ )<br>CD ( $n = 20$ )    | Minas Gerais (Brazil)              | Natural                | IgG1 associated with AD.<br>IgG2 associated with SD.          | [36]      |
|                  |                   |                     | P-8 and SLA (polyclonal)                                  | AD ( $n = 8$ )<br>OD ( $n = 12$ )<br>PD ( $n = 1$ )<br>CD ( $n = 9$ )       | Cali (Colombia) and Madrid (Spain) | Experimental           | IgG1 associated with SD.                                      | [4]       |
|                  |                   |                     | <i>L.i.</i> antigen (polyclonal)                          | AD ( $n = 2$ )<br>SD ( $n = 4$ )<br>CD ( $n = 20$ )                         | St Feliu de Codines (Spain)        | Experimental           | IgG1 associated with SD.                                      | [7]       |
|                  |                   |                     | SLA (polyclonal)                                          | AD ( $n = 116$ )<br>SD ( $n = 72$ )                                         | Alto Douro (Portugal)              | Natural                | IgG2 associated with SD.                                      | [37]      |
|                  |                   |                     | SLA (polyclonal)                                          | AD ( $n = 7$ )<br>OD ( $n = 22$ )<br>SD ( $n = 13$ )                        | Belo Horizonte (Brazil)            | Natural                | Similar IgG1 levels among groups.<br>IgG2 associated with SD. | [38]      |
|                  |                   |                     | <i>L.i.</i> antigen (polyclonal)                          | AD ( $n = 24$ )<br>SD ( $n = 21$ )<br>CDNE ( $n = 24$ )<br>CDE ( $n = 64$ ) | Spain                              | Natural                | Similar IgG1 levels among groups.<br>IgG2 associated with SD. | [39]      |
|                  |                   |                     | SLA (polyclonal)                                          | AD<br>OD<br>PD<br>CD                                                        | Cali (Colombia)                    | Experimental           | Similar IgG1 and IgG2 levels among groups.                    | [9]       |
|                  |                   |                     | CLA (monoclonal)                                          | AD ( $n = 37$ )<br>SD ( $n = 22$ )                                          | Brazil                             | Natural                | IgG1 and IgG2 ↑ in SD.                                        | [40]      |
|                  |                   |                     | f/t <i>L.i.</i> antigen (polyclonal)                      | Infected resistant ( $n = 4$ )                                              | Iowa (USA)                         | Natural                | IgG1 and IgG2 ↑ in susceptible infected and clinical          | [14]      |

|                                   |                                                                 |                                                | Infected susceptible ( <i>n</i> = 3)<br>Clinical ( <i>n</i> = 4)<br>CD ( <i>n</i> = 2)     | groups.                                                                                                                                      |                                                                 |                                                                                                |                                                           |                          |
|-----------------------------------|-----------------------------------------------------------------|------------------------------------------------|--------------------------------------------------------------------------------------------|----------------------------------------------------------------------------------------------------------------------------------------------|-----------------------------------------------------------------|------------------------------------------------------------------------------------------------|-----------------------------------------------------------|--------------------------|
|                                   |                                                                 |                                                | SLA (polyclonal)                                                                           | AD ( <i>n</i> = 20)<br>SD ( <i>n</i> = 20)<br>CD ( <i>n</i> = 5)                                                                             | Belo Horizonte (Brazil)                                         | Natural                                                                                        | IgG1 associated with AD.<br>IgG2 associated with SD.      | [41]                     |
|                                   |                                                                 |                                                | SLA (polyclonal)                                                                           | AD-I ( <i>n</i> = 8)<br>AD-II ( <i>n</i> = 10)<br>SD ( <i>n</i> = 16)<br>CD ( <i>n</i> = 7)                                                  | Belo Horizonte (Brazil)                                         | Natural                                                                                        | Low IgG1 levels in all groups.<br>IgG2 ↑ in AD-II and SD. | [42]                     |
|                                   |                                                                 |                                                | <i>L.c.</i> and <i>L.b.</i> antigens (polyclonal)                                          | AD ( <i>n</i> = 12)<br>SD ( <i>n</i> = 25)<br>CD ( <i>n</i> = 17)                                                                            | Rio de Janeiro (Brazil)                                         | Natural                                                                                        | IgG1 and IgG2 ↑ in SD.                                    | [43]                     |
|                                   |                                                                 |                                                | SLA (polyclonal)                                                                           | AD ( <i>n</i> = 10)<br>SD ( <i>n</i> = 68)<br>CD ( <i>n</i> = 7)                                                                             | Fortaleza (Brazil)                                              | Natural                                                                                        | IgG1 associated with AD.<br>IgG2 associated with SD.      | [44]                     |
|                                   |                                                                 |                                                | CLA or SLA (polyclonal)                                                                    | AD <sup>+</sup> ( <i>n</i> = 21)<br>AD <sup>-</sup> ( <i>n</i> = 62)<br>SD <sup>+</sup> ( <i>n</i> = 52)<br>SD <sup>-</sup> ( <i>n</i> = 25) | Araçatuba (Brazil)                                              | Natural                                                                                        | IgG1 associated with SD.                                  | [45]                     |
|                                   |                                                                 |                                                | SLA (polyclonal)                                                                           | AD ( <i>n</i> = 28)<br>SD ( <i>n</i> = 22)                                                                                                   | Vila Santana do Cafezal (Brazil)                                | Natural                                                                                        | IgG1 associated with SD.<br>IgG2 high in both AD and SD.  | [46]                     |
|                                   |                                                                 |                                                | SLA, LACK & LeIF (polyclonal)                                                              | AD ( <i>n</i> = 26)<br>SD ( <i>n</i> = 34)<br>CD ( <i>n</i> = 26)<br>CDE ( <i>n</i> = 45)                                                    | Tunisia                                                         | Natural                                                                                        | IgG1 and IgG2 ↑ in SD.                                    | [47]                     |
|                                   |                                                                 |                                                | LiAg or A2 protein (polyclonal)                                                            | AD ( <i>n</i> = 10)<br>SD ( <i>n</i> = 10)<br>VD ( <i>n</i> = 12)<br>CD ( <i>n</i> = 12)                                                     | Barra Mansa (Brazil)                                            | Natural                                                                                        | IgG1 associated with SD.<br>IgG2 associated with AD.      | [48]                     |
|                                   |                                                                 |                                                | Portions of r-pot B domain (polyclonal)                                                    | AD ( <i>n</i> = 11)<br>OD( <i>n</i> = 12)<br>SD ( <i>n</i> = 15)<br>CD ( <i>n</i> = 10)<br>CDE ( <i>n</i> = 17)                              | Minas Gerais (Brazil)                                           | Natural                                                                                        | IgG1 and IgG2 associated with AD.                         | [49]                     |
|                                   |                                                                 |                                                | Western Blot                                                                               | <i>L.i.</i> antigens (polyclonal)                                                                                                            | AD ( <i>n</i> = 78)<br>OD ( <i>n</i> = 2)<br>PD ( <i>n</i> = 7) | Madrid (Spain)                                                                                 | Natural                                                   | IgG2 associated with SD. |
| Promastigote extract (polyclonal) | AD ( <i>n</i> = 9)<br>SD ( <i>n</i> = 5)<br>CD ( <i>n</i> = 52) | Attiki area (Greece)                           |                                                                                            | Natural                                                                                                                                      | IgG2:IgG1 ratio ↑ in AD <i>versus</i> SD.                       | [50]                                                                                           |                                                           |                          |
| IgG1, IgG2, IgG3, IgG4            | ELISA                                                           | CLA (monoclonal)                               | AD<br>OD<br>PD<br>( <i>n</i> = 126)                                                        | Salvaterra (Brazil)                                                                                                                          | Natural                                                         | IgG1, IgG2, IgG3, and IgG4 associated with SD.                                                 | [51]                                                      |                          |
|                                   |                                                                 | CLA (monoclonal)                               | AD ( <i>n</i> = 120)<br>SD ( <i>n</i> = 24)<br>VD ( <i>n</i> = 40)                         | Belo Horizonte (Brazil)                                                                                                                      | Natural                                                         | IgG1 and IgG4 associated with AD.<br>IgG2 associated with SD.<br>Low IgG3 levels in AD and SD. | [52]                                                      |                          |
|                                   |                                                                 | <i>L.c.</i> lysate (polyclonal and monoclonal) | AD ( <i>n</i> = 45)<br>SD ( <i>n</i> = 45)<br>VD ( <i>n</i> = 37)<br>CDNE ( <i>n</i> = 45) | Sao Paolo (Brazil)                                                                                                                           | Natural                                                         | Using pAb, IgG1 and IgG2 ↑ in AD and SD.<br>Using mAb, IgG1, IgG3 and IgG4 ↑ in SD.            | [53]                                                      |                          |
|                                   |                                                                 | SLA (polyclonal)                               | AD<br>SD<br>CD                                                                             | Alto Douro region (Portugal)                                                                                                                 | Natural                                                         | Low IgM values in infected dogs.                                                               | [33]                                                      |                          |
| IgM                               | -                                                               | ELISA                                          | SLA (polyclonal)                                                                           | AD ( <i>n</i> = 12)<br>OD ( <i>n</i> = 12)<br>SD ( <i>n</i> = 16)<br>CD ( <i>n</i> = 20)                                                     | Minas Gerais (Brazil)                                           | Natural                                                                                        | ↑ IgM in all infected dogs.                               | [36]                     |
|                                   |                                                                 |                                                | <i>L.i.</i> antigen (polyclonal)                                                           | AD ( <i>n</i> = 2)<br>SD ( <i>n</i> = 4)                                                                                                     | St Feliu de Codines (Spain)                                     | Experimental                                                                                   | IgM appeared in SD later in the infection.                | [7]                      |

|  |  |  |  |  |  |  |                                |
|--|--|--|--|--|--|--|--------------------------------|
|  |  |  |  |  |  |  | CD (n = 20)                    |
|  |  |  |  |  |  |  | AD (n = 132)                   |
|  |  |  |  |  |  |  | SD (n = 106)                   |
|  |  |  |  |  |  |  | CD (n = 20)                    |
|  |  |  |  |  |  |  | Barcelona and Mallorca (Spain) |
|  |  |  |  |  |  |  | AD-I (n = 8)                   |
|  |  |  |  |  |  |  | AD-II (n = 10)                 |
|  |  |  |  |  |  |  | SD (n = 16)                    |
|  |  |  |  |  |  |  | CD (n = 7)                     |
|  |  |  |  |  |  |  | Belo Horizonte (Brazil)        |
|  |  |  |  |  |  |  | AD (n = 10)                    |
|  |  |  |  |  |  |  | SD (n = 68)                    |
|  |  |  |  |  |  |  | CD (n = 7)                     |
|  |  |  |  |  |  |  | Fortaleza (Brazil)             |
|  |  |  |  |  |  |  | Natural                        |
|  |  |  |  |  |  |  | AD (n = 2)                     |
|  |  |  |  |  |  |  | SD (n = 4)                     |
|  |  |  |  |  |  |  | CD (n = 20)                    |
|  |  |  |  |  |  |  | St Feliu de Codines (Spain)    |
|  |  |  |  |  |  |  | Experimental                   |
|  |  |  |  |  |  |  | AD (n = 132)                   |
|  |  |  |  |  |  |  | SD (n = 106)                   |
|  |  |  |  |  |  |  | CD (n = 20)                    |
|  |  |  |  |  |  |  | Barcelona and Mallorca (Spain) |
|  |  |  |  |  |  |  | Natural                        |
|  |  |  |  |  |  |  | AD (n = 12)                    |
|  |  |  |  |  |  |  | OD (n = 12)                    |
|  |  |  |  |  |  |  | SD (n = 16)                    |
|  |  |  |  |  |  |  | CD (n = 20)                    |
|  |  |  |  |  |  |  | Minas Gerais (Brazil)          |
|  |  |  |  |  |  |  | AD-I (n = 8)                   |
|  |  |  |  |  |  |  | AD-II (n = 10)                 |
|  |  |  |  |  |  |  | SD (n = 16)                    |
|  |  |  |  |  |  |  | CD (n = 7)                     |
|  |  |  |  |  |  |  | Belo Horizonte (Brazil)        |
|  |  |  |  |  |  |  | AD (n = 10)                    |
|  |  |  |  |  |  |  | SD (n = 68)                    |
|  |  |  |  |  |  |  | CD (n = 7)                     |
|  |  |  |  |  |  |  | Fortaleza (Brazil)             |
|  |  |  |  |  |  |  | Natural                        |
|  |  |  |  |  |  |  | AD (n = 13)                    |
|  |  |  |  |  |  |  | SD (n = 42)                    |
|  |  |  |  |  |  |  | CDE (n = 21)                   |
|  |  |  |  |  |  |  | CDNE (n = 18)                  |
|  |  |  |  |  |  |  | E and NE areas from Brazil     |
|  |  |  |  |  |  |  | AD (n = 29)                    |
|  |  |  |  |  |  |  | SD (n = 23)                    |
|  |  |  |  |  |  |  | CDE (n = 3)                    |
|  |  |  |  |  |  |  | CDNE (n = 19)                  |
|  |  |  |  |  |  |  | Spain & France                 |
|  |  |  |  |  |  |  | AD (n = 12)                    |
|  |  |  |  |  |  |  | OD (n = 12)                    |
|  |  |  |  |  |  |  | SD (n = 16)                    |
|  |  |  |  |  |  |  | CD (n = 20)                    |
|  |  |  |  |  |  |  | Minas Gerais (Brazil)          |
|  |  |  |  |  |  |  | AD-I (n = 8)                   |
|  |  |  |  |  |  |  | AD-II (n = 10)                 |
|  |  |  |  |  |  |  | SD (n = 16)                    |
|  |  |  |  |  |  |  | CD (n = 7)                     |
|  |  |  |  |  |  |  | Belo Horizonte (Brazil)        |
|  |  |  |  |  |  |  | AD (n = 10)                    |
|  |  |  |  |  |  |  | SD (n = 68)                    |
|  |  |  |  |  |  |  | CD (n = 7)                     |
|  |  |  |  |  |  |  | Fortaleza (Brazil)             |
|  |  |  |  |  |  |  | Natural                        |
|  |  |  |  |  |  |  | AD <sup>+</sup> (n = 21)       |
|  |  |  |  |  |  |  | AD <sup>-</sup> (n = 62)       |
|  |  |  |  |  |  |  | SD <sup>+</sup> (n = 52)       |
|  |  |  |  |  |  |  | SD <sup>-</sup> (n = 25)       |
|  |  |  |  |  |  |  | Araçatuba (Brazil)             |

CLA: crude *Leishmania* antigen; f/t antigen: freezed/thawed antigen; SLA: soluble *Leishmania* antigen; AD: asymptomatic dogs; AD-I: asymptomatic dogs with negative serology; AD-II: asymptomatic dogs with positive serology ; OD: oligosymptomatic dogs; PD: polysymptomatic dogs; SD: symptomatic dogs; TSD: treated symptomatic dogs; TD: treated infected dogs; CD: control healthy dogs; CDE: control healthy dogs from endemic areas; CDNE: control healthy dogs from non-endemic areas; VD: vaccinated healthy dogs; AD<sup>+</sup> : asymptomatic dogs infected with *L. chagasi*; AD<sup>-</sup>: asymptomatic dogs uninfected with *L. chagasi*; SD<sup>+</sup> : symptomatic dogs infected with *L. chagasi*; SD<sup>-</sup>: symptomatic dogs uninfected with *L. chagasi*; E: endemic areas; NE: non-endemic areas; pAb: polyclonal antibodies; mAb: monoclonal antibodies; *L.i.*: *Leishmania infantum*; *L.c.*: *Leishmania chagasi*; *L.b.*: *Leishmania braziliensis*.

## References

1. Pinelli, E.; Killick-Kendrick, R.; Wagenaar, J.; Bernadina, W.; Del Real, G.; Ruitenbergh, J. Cellular and humoral immune responses in dogs experimentally and naturally infected with *Leishmania infantum*. *Infect. Immun.* **1994**, *62*, 229–235, doi:10.1128/iai.62.1.229-235.1994.
2. Leandro, C.; Santos-Gomes, G.M.; Campino, L.; Romão, P.; Cortes, S.; Rolão, N.; Gomes-Pereira, S.; Riça Capela, M.J.; Abranches, P. Cell mediated immunity and specific IgG1 and IgG2 antibody response in natural and experimental canine

- leishmaniosis. *Vet. Immunol. Immunopathol.* **2001**, 79, 273–284, doi:10.1016/S0165-2427(01)00270-7.
3. Fernández-Pérez, F.J.; Gómez-Muñoz, M.T.; Méndez, S.; Alunda, J.M. Leishmania-specific lymphoproliferative responses and IgG1/IgG2 immunodetection patterns by Western blot in asymptomatic, symptomatic and treated dogs. *Acta Trop.* **2003**, 86, 83–91, doi:10.1016/S0001-706X(03)00004-4.
4. Carrillo, E.; Ahmed, S.; Goldsmith-Pestana, K.; Nieto, J.; Osorio, Y.; Travi, B.; Moreno, J.; McMahon-Pratt, D. Immunogenicity of the P-8 amastigote antigen in the experimental model of canine visceral leishmaniasis. *Vaccine* **2007**, 25, 1534–1543, doi:10.1016/j.vaccine.2006.10.036.
5. Carrillo, E.; Crusat, M.; Nieto, J.; Chicharro, C.; Thomas, M. del C.; Martínez, E.; Valladares, B.; Cañavate, C.; Requena, J.M.; López, M.C.; et al. Immunogenicity of HSP-70, KMP-11 and PFR-2 leishmanial antigens in the experimental model of canine visceral leishmaniasis. *Vaccine* **2008**, 26, 1902–1911, doi:10.1016/j.vaccine.2008.01.042.
6. De Luna, R.; Vuotto, M.L.; Ielpo, M.T.L.; Ambrosio, R.; Piantedosi, D.; Moscatiello, V.; Ciaramella, P.; Scalone, A.; Gradoni, L.; Mancino, D. Early suppression of lymphoproliferative response in dogs with natural infection by *Leishmania infantum*. *Vet. Immunol. Immunopathol.* **1999**, 70, 95–103, doi:10.1016/S0165-2427(99)00073-2.
7. Rodríguez-Cortés, A.; Ojeda, A.; López-Fuertes, L.; Timón, M.; Altet, L.; Solano-Gallego, L.; Sánchez-Robert, E.; Francino, O.; Alberola, J. A long term experimental study of canine visceral leishmaniasis. *Int. J. Parasitol.* **2007**, 37, 683–693, doi:10.1016/j.ijpara.2006.11.007.
8. Rodríguez-Cortés, A.; Fernández-Bellón, H.; Ramis, A.; Ferrer, L.; Alberola, J.; Solano-Gallego, L. Leishmania-specific isotype levels and their relationship with specific cell-mediated immunity parameters in canine leishmaniasis. *Vet. Immunol. Immunopathol.* **2007**, 116, 190–198, doi:10.1016/j.vetimm.2007.01.015.
9. Travi, B.L.; Osorio, E.Y.; Saldarriaga, O.A.; Cadena, H.; Tabares, C.J.; Peniche, A.; Lee, S.; Melby, P.C. Clinical, parasitologic, and immunologic evolution in dogs experimentally infected with sand fly-derived *Leishmania chagasi* promastigotes. *Am. J. Trop. Med. Hyg.* **2009**, 81, 994–1003, doi:10.4269/ajtmh.2009.09-0229.
10. Da Costa Pinheiro, P.H.; De Souza Dias, S.; Dantas Eulálio, K.; Mendonça, I.L.; Katz, S.; Barbiéri, C.L. Recombinant cysteine proteinase from *Leishmania (Leishmania) chagasi* implicated in human and dog T-cell responses. *Infect. Immun.* **2005**, 73, 3787–3789, doi:10.1128/IAI.73.6.3787-3789.2005.
11. Rhalem, A.; Sahibi, H.; Guessous-Idrissi, N.; Lasri, S.; Natami, A.; Riyad, M.; Berrag, B. Immune response against *Leishmania* antigens in dogs naturally and experimentally infected with *Leishmania infantum*. *Vet. Parasitol.* **1999**, 81, 173–184, doi:10.1016/S0304-4017(98)00240-4.
12. Rafati, S.; Nakhaee, A.; Taheri, T.; Ghashghaii, A.; Salmanian, A.H.; Jimenez, M.; Mohebbali, M.; Masina, S.; Fasel, N. Expression of cysteine proteinase type I and II of *Leishmania infantum* and their recognition by sera during canine and human visceral leishmaniasis. *Exp. Parasitol.* **2003**, 103, 143–151, doi:10.1016/S0014-4894(03)00097-3.
13. Nakhaee, A.; Taheri, T.; Taghikhani, M.; Mohebbali, M.; Salmanian, A.H.; Fasel, N.; Rafati, S. Humoral and cellular immune responses against Type I cysteine proteinase of *Leishmania infantum* are higher in asymptomatic than symptomatic dogs selected from a naturally infected population. *Vet. Parasitol.* **2004**, 119, 107–123, doi:10.1016/j.vetpar.2003.11.013.
14. Boggiatto, P.M.; Ramer-Tait, A.E.; Metz, K.; Kramer, E.E.; Gibson-Corley, K.; Mullin, K.; Hostetter, J.M.; Gallup, J.M.; Jones, D.E.; Petersen, C.A. Immunologic indicators of clinical progression during canine *Leishmania infantum* infection. *Clin. Vaccine Immunol.* **2010**, 17, 267–273, doi:10.1128/CVI.00456-09.
15. Esch, K.J.; Juelsgaard, R.; Martinez, P.A.; Jones, D.E.; Petersen, C.A. Programmed Death 1-Mediated T Cell Exhaustion during Visceral Leishmaniasis Impairs Phagocyte Function. *J. Immunol.* **2013**, 191, 5542–5550, doi:10.4049/jimmunol.1301810.
16. Cabral, M.; O'Grady, J.; Alexander, J. Demonstration of *Leishmania* specific cell mediated and humoral immunity in asymptomatic dogs. *Parasite Immunol.* **1992**, 14, 531–539, doi:10.1111/j.1365-3024.1992.tb00026.x.
17. Cabral, M.; O'Grady, J.E.; Gomes, S.; Sousa, J.C.; Thompson, H.; Alexander, J. The immunology of canine leishmaniosis: Strong evidence for a developing disease spectrum from asymptomatic dogs. *Vet. Parasitol.* **1998**, 76, 173–180, doi:10.1016/S0304-4017(97)00208-2.
18. Pinelli, E.; Gonzalo, R.M.; Boog, C.J.P.; Rutten, V.P.M.G.; Gebhard, D.; Del Real, G.; Ruitenber, E.J. *Leishmania infantum*-specific T cell lines derived from asymptomatic dogs that lyse infected macrophages in a major histocompatibility complex-restricted manner. *Eur. J. Immunol.* **1995**, 25, 1594–1600, doi:10.1002/eji.1830250619.
19. Schaut, R.G.; Lamb, I.M.; Toepp, A.J.; Scott, B.; Mendes-Aguiar, C.O.; Coutinho, J.F. V.; Jeronimo, S.M.B.; Wilson, M.E.; Harty, J.T.; Waldschmidt, T.J.; et al. Regulatory IgD hi B Cells Suppress T Cell Function via IL-10 and PD-L1 during Progressive Visceral Leishmaniasis. *J. Immunol.* **2016**, 196, 4100–4109, doi:10.4049/jimmunol.1502678.
20. Cortese, L.; Annunziatella, M.; Palatucci, A.T.; Rubino, V.; Piantedosi, D.; Di Loria, A.; Ruggiero, G.; Ciaramella, P.; Terrazzano, G. Regulatory T cells, Cytotoxic T lymphocytes and a Th1 cytokine profile in dogs naturally infected by *Leishmania infantum*. *Res. Vet. Sci.* **2013**, 95, 942–949, doi:10.1016/j.rvsc.2013.08.005.
21. Gomes de Almeida Leal, G.; Mendes Roatt, B.; Dian de Oliveira Aguiar-Soares, R.; Martins Carneiro, C.; Cordeiro Giunchetti, R.; Teixeira-Carvalho, A.; Assis Martins-Filho, O.; Fortes Francisco, A.; Mirelle Cardoso, J.; Siqueira Mathias, F.A.; et al. Immunological profile of resistance and susceptibility in naturally infected dogs by *Leishmania infantum*. *Vet. Parasitol.* **2014**, 205, 472–482, doi:10.1016/j.vetpar.2014.08.022.
22. Matralis, D.; Papadogiannakis, E.; Kontos, V.; Papadopoulos, E.; Ktenas, E.; Koutinas, A. Detection of intracellular IFN- $\gamma$  and IL-4 cytokines in CD4+ and CD8+ T cells in the peripheral blood of dogs naturally infected with *Leishmania infantum*. *Parasite Immunol.* **2016**, 38, 510–515, doi:10.1111/pim.12335.
23. Solano-Gallego, L.; Montserrat-Sangrà, S.; Ordeix, L.; Martínez-Orellana, P. *Leishmania infantum*-specific production of IFN- $\gamma$  and IL-10 in stimulated blood from dogs with clinical leishmaniosis. *Parasites and Vectors* **2016**, 9, 1–10, doi:10.1186/s13071-016-

1598-y.

24. Panaro, M.A.; Brandonisio, O.; Cianciulli, A.; Cavallo, P.; Lacasella, V.; Paradies, P.; Testini, G.; De Caprariis, D.; Mitolo, V.; Otranto, D. Cytokine expression in dogs with natural *Leishmania infantum* infection. *Parasitology* **2009**, *136*, 823–831, doi:10.1017/S0031182009006155.
25. Chamizo, C.; Moreno, J.; Alvar, J. Semi-quantitative analysis of cytokine expression in asymptomatic canine leishmaniasis. *Vet. Immunol. Immunopathol.* **2005**, *103*, 67–75, doi:10.1016/j.vetimm.2004.08.010.
26. Solcà, M.S.; Andrade, B.B.; Abbehusen, M.M.C.; Teixeira, C.R.; Khouri, R.; Valenzuela, J.G.; Kamhawi, S.; Bozza, P.T.; Fraga, D.B.M.; Borges, V.M.; et al. Circulating Biomarkers of Immune Activation, Oxidative Stress and Inflammation Characterize Severe Canine Visceral Leishmaniasis. *Sci. Rep.* **2016**, *6*, 32619:1-32619:7, doi:10.1038/srep32619.
27. Abbehusen, M.M.C.; Dos Anjos Almeida, V.; Da, S.M.; Da Silva Pereira, L.; Costa, D.J.; Gil-Santana, L.; Bozza, P.T.; Fraga, D.B.M.; Veras, P.S.T.; Dos-Santos, W.L.C.; et al. Clinical and immunopathological findings during long term follow-up in *Leishmania infantum* experimentally infected dogs. *Sci. Rep.* **2017**, *7*, 1–11, doi:10.1038/s41598-017-15651-8.
28. Barbosa, M.A.G.; Alexandre-Pires, G.; Soares-Clemente, M.; Marques, C.; Rodrigues, O.R.; De Brito, T.V.; Da Fonseca, I.P.; Alves, L.C.; Santos-Gomes, G.M. Cytokine Gene Expression in the Tissues of Dogs Infected by *Leishmania infantum*. *J. Comp. Pathol.* **2011**, *145*, 336–344, doi:10.1016/j.jcpa.2011.03.001.
29. Manna, L.; Reale, S.; Viola, E.; Vitale, F.; Manzillo, V.F.; Michele, P.L.; Caracappa, S.; Gravino, A.E. Leishmania DNA load and cytokine expression levels in asymptomatic naturally infected dogs. *Vet. Parasitol.* **2006**, *142*, 271–280, doi:10.1016/j.vetpar.2006.06.028.
30. Bourdoiseau, G.; Bonnefont, C.; Hoareau, E.; Boehringer, C.; Stolle, T.; Chabanne, L. Specific IgG1 and IgG2 antibody and lymphocyte subset levels in naturally *Leishmania infantum*-infected treated and untreated dogs. *Vet. Immunol. Immunopathol.* **1997**, *59*, 21–30, doi:10.1016/S0165-2427(97)00072-X.
31. Nieto, C.G.; García-Alonso, M.; Requena, J.M.; Mirón, C.; Soto, M.; Alonso, C.; Navarrete, I. Analysis of the humoral immune response against total and recombinant antigens of *Leishmania infantum*: Correlation with disease progression in canine experimental leishmaniasis. *Vet. Immunol. Immunopathol.* **1999**, *67*, 117–130, doi:10.1016/S0165-2427(98)00213-X.
32. Solano-Gallego, L.; Riera, C.; Roura, X.; Iniesta, L.; Gallego, M.; Valladares, J.E.; Fisa, R.; Castillejo, S.; Alberola, J.; Ferrer, L.; et al. *Leishmania infantum*-specific IgG, IgG1 and IgG2 antibody responses in healthy and ill dogs from endemic areas: Evolution in the course of infection and after treatment. *Vet. Parasitol.* **2001**, *96*, 265–276, doi:10.1016/S0304-4017(00)00446-5.
33. Cordeiro-da-Silva, A.; Cardoso, L.; Araújo, N.; Castro, H.; Tomás, A.; Rodrigues, M.; Cabral, M.; Vergnes, B.; Sereno, D.; Ouassii, A. Identification of antibodies to *Leishmania* silent information regulatory 2 (SIR2) protein homologue during canine natural infections: Pathological implications. *Immunol. Lett.* **2003**, *86*, 155–162, doi:10.1016/S0165-2478(03)00020-8.
34. Almeida, M.A.O.; Jesus, E.E.V.; Sousa-Atta, M.L.B.; Alves, L.C.; Berne, M.E.A.; Atta, A.M. Antileishmanial antibody profile in dogs naturally infected with *Leishmania chagasi*. *Vet. Immunol. Immunopathol.* **2005**, *106*, 151–158, doi:10.1016/j.vetimm.2004.08.024.
35. Iniesta, L.; Gállego, M.; Portús, M. Immunoglobulin G and E responses in various stages of canine leishmaniosis. *Vet. Immunol. Immunopathol.* **2005**, *103*, 77–81, doi:10.1016/j.vetimm.2004.08.011.
36. Reis, A.B.; Teixeira-Carvalho, A.; Vale, A.M.; Marques, M.J.; Giunchetti, R.C.; Mayrink, W.; Guerra, L.L.; Andrade, R.A.; Corrêa-Oliveira, R.; Martins-Filho, O.A. Isotype patterns of immunoglobulins: Hallmarks for clinical status and tissue parasite density in Brazilian dogs naturally infected by *Leishmania* (*Leishmania*) *chagasi*. *Vet. Immunol. Immunopathol.* **2006**, *112*, 102–116, doi:10.1016/j.vetimm.2006.02.001.
37. Cardoso, L.; Schallig, H.D.F.H.; Cordeiro-da-Silva, A.; Cabral, M.; Alunda, J.M.; Rodrigues, M. Anti-*Leishmania* humoral and cellular immune responses in naturally infected symptomatic and asymptomatic dogs. *Vet. Immunol. Immunopathol.* **2007**, *117*, 35–41, doi:10.1016/j.vetimm.2007.01.014.
38. da Costa-Val, A.P.; Cavalcanti, R.R.; de Figueiredo Gontijo, N.; Marques Michalick, M.S.; Alexander, B.; Williams, P.; Melo, M.N. Canine visceral leishmaniasis: Relationships between clinical status, humoral immune response, haematology and *Lutzomyia* (*Lutzomyia*) *longipalpis* infectivity. *Vet. J.* **2007**, *174*, 636–643, doi:10.1016/j.tvjl.2006.11.006.
39. Iniesta, L.; Gállego, M.; Portús, M. Idiotypic expression of IgG1 and IgG2 in dogs naturally infected with *Leishmania infantum*. *Vet. Immunol. Immunopathol.* **2007**, *119*, 189–197, doi:10.1016/j.vetimm.2007.05.006.
40. Carson, C.; Quinnell, R.J.; Day, M.J.; Courtenay, O. Comparison of monoclonal and polyclonal antibodies for the detection of canine IgG1 and IgG2, and associations with infection outcome in *Leishmania infantum* naturally infected dogs. *Vet. Immunol. Immunopathol.* **2010**, *133*, 264–268, doi:10.1016/j.vetimm.2009.07.017.
41. Neto, R.G.T.; Giunchetti, R.C.; Carneiro, C.M.; Vitor, R.W. de A.; Coura-Vital, W.; Quaresma, P.F.; Ker, H.G.; Melo, L.A. de; Gontijo, C.M.F.; Reis, A.B. Relationship of *Leishmania*-specific IgG levels and IgG avidity with parasite density and clinical signs in canine leishmaniasis. *Vet. Parasitol.* **2010**, *169*, 248–257, doi:10.1016/j.vetpar.2010.01.023.
42. Coura-Vital, W.; Marques, M.J.; Giunchetti, R.C.; Teixeira-Carvalho, A.; Moreira, N.D.; Vitoriano-Souza, J.; Vieira, P.M.; Carneiro, C.M.; Corrêa-Oliveira, R.; Martins-Filho, O.A.; et al. Humoral and cellular immune responses in dogs with inapparent natural *Leishmania infantum* infection. *Vet. J.* **2011**, *190*, 43–47, doi:10.1016/j.tvjl.2011.04.005.
43. Ribeiro, F.C.; Schubach, A. de O.; Mouta-Confort, E.; Pacheco, T.M.V.; Madeira, M. de F.; Abboud, L.C. de S.; Honse, C. de O.; Alves, A.S.; Marzochi, M.C.A. Use of ELISA employing homologous and heterologous antigens for the detection of IgG and subclasses (IgG1 and IgG2) in the diagnosis of Canine Visceral Leishmaniasis. *Rev. Inst. Med. Trop. Sao Paulo* **2011**, *53*, 283–289, doi:10.1590/S0036-46652011000500008.
44. De Freitas, J.C.C.; Lopes-Neto, B.E.; De Abreu, C.R.A.; Coura-Vital, W.; Braga, S.L.; Reis, A.B.; Nunes-Pinheiro, D.C.S. Profile of anti-*Leishmania* antibodies related to clinical picture in canine visceral leishmaniasis. *Res. Vet. Sci.* **2012**, *93*, 705–709,



doi:10.1016/j.rvsc.2011.12.009.

45. Laranjeira, D.F.; Da Matta, V.L.R.; Tomokane, T.Y.; Marcondes, M.; Corbet, C.E.P.; Laurenti, M.D. Serological and infection statuses of dogs from a visceral leishmaniasis-endemic area. *Rev. Saude Publica* **2014**, *48*, 563–570, doi:10.1590/S0034-8910.2014048005224.
46. Lima, L.V.D.R.; Carneiro, L.A.; Campos, M.B.; Vasconcelos Dos Santos, T.; Ramos, P.K.; Laurenti, M.D.; Teixeira, C.E.C.; Silveira, F.T. Further evidence associating IgG1, but not IgG2, with susceptibility to canine visceral leishmaniasis caused by *Leishmania (L.) infantum* chagasi -infection. *Parasite* **2017**, *24*, 37:1-37:11, doi:10.1051/parasite/2017039.
47. Chaabouni, A.; Boubaker Elandoulsi, R.; Mhadhbi, M.; Gharbi, M.; Sassi, A. Comparative analysis of the *Leishmania infantum*-specific antibody repertoires and the autoantibody repertoires between asymptomatic and symptomatic dogs. *Vet. Parasitol.* **2018**, *261*, 9–17, doi:10.1016/j.vetpar.2018.07.011.
48. Campos, M.P.; Figueiredo, F.B.; Morgado, F.N.; Renzetti, A.R. dos S.; de Souza, S.M.M.; Pereira, S.A.; Rodrigues-Da-Silva, R.N.; Lima-Junior, J.D.C.; De Luca, P.M. *Leishmania infantum* virulence factor A2 protein: Linear B-cell epitope mapping and identification of three main linear B-cell epitopes in vaccinated and naturally infected dogs. *Front. Immunol.* **2018**, *9*, 1690:1-1690:11, doi:10.3389/fimmu.2018.01690.
49. Maia, A.C.R.G.; Porcino, G.N.; Faria-Pinto, P.; Mendes, T.V.; Antinarelli, L.M.R.; Coimbra, E.S.; Reis, A.B.; Juliano, L.; Juliano, M.A.; Marques, M.J.; et al. *Leishmania infantum* nucleoside triphosphate diphosphohydrolase 1 (NTPDase 1) B-domain: Antibody antiproliferative effect on the promastigotes and IgG subclass responses in canine visceral leishmaniasis. *Vet. Parasitol.* **2019**, *271*, 38–44, doi:10.1016/j.vetpar.2019.06.004.
50. Agallou, M.; Athanasiou, E.; Samiotaki, M.; Panayotou, G.; Karagouni, E. Identification of immunoreactive *Leishmania infantum* protein antigens to asymptomatic dog sera through combined immunoproteomics and bioinformatics analysis. *PLoS One* **2016**, *11*, 1–22, doi:10.1371/journal.pone.0149894.
51. Quinnell, R.J.; Courtenay, O.; Garcez, L.M.; Kaye, P.M.; Shaw, M.A.; Dye, C.; Day, M.J. IgG subclass responses in a longitudinal study of canine visceral leishmaniasis. *Vet. Immunol. Immunopathol.* **2003**, *91*, 161–168, doi:10.1016/S0165-2427(02)00311-2.
52. Oliveira, T.M.F.S.; Mineo, T.W.P.; Bason, M.; Day, M.J.; Machado, R.Z. IgG subclass profile of serum antibodies to *Leishmania chagasi* in naturally infected and vaccinated dogs. *Vet. Parasitol.* **2009**, *162*, 16–22, doi:10.1016/j.vetpar.2009.02.018.
53. Marcondes, M.; Ikeda, F.A.; Vieira, R.F.C.; Day, M.J.; Lima, V.M.F.; Rossi, C.N.; Perri, S.H.V.; Biondo, A.W. Temporal IgG subclasses response in dogs following vaccination against *Leishmania* with Leishmune ®. *Vet. Parasitol.* **2011**, *181*, 153–159, doi:10.1016/j.vetpar.2011.04.004.
